# Supplementary material for: Is the Change in Prevalence of High Myopia Compared to That of Myopia Really Disproportionate?
Source: PubMed Central journal article supplement — Transl Vis Sci Technol. 2024 Oct 7;13(10):11. doi: 10.1167/tvst.13.10.11 (PMC11463711; doi:10.1167/tvst.13.10.11), 2024-10-07
Supplement: tvst-13-10-11_s001.pdf [file tvst-13-10-11_s001.pdf]

Supplementary table: Studies and data sets comprising the convenience sample.

| Study and location                      | Year of publication | Age (Sub-group) | Sample size | Refractive threshold (D) | Prevalence (%) |
|-----------------------------------------|---------------------|-----------------|-------------|--------------------------|----------------|
| Baltimore (USA) <sup>1</sup>            | 1997                | 40-49 (Black)   | 613         | -0.5                     | 30.7           |
|                                         |                     |                 |             | -3                       | 3.3            |
|                                         |                     |                 |             | -6                       | 1.0            |
|                                         |                     | 50-59 (Black)   | 666         | -0.5                     | 20.9           |
|                                         |                     |                 |             | -3                       | 3.9            |
|                                         |                     |                 |             | -6                       | 0.9            |
|                                         |                     | 40-49 (White)   | 531         | -0.5                     | 40.9           |
|                                         |                     |                 |             | -3                       | 11.1           |
|                                         |                     |                 |             | -6                       | 2.5            |
|                                         |                     | 50-59 (White)   | 598         | -0.5                     | 24.9           |
| -3                                      | 4.9                 |                 |             |                          |                |
| -6                                      | 1.7                 |                 |             |                          |                |
| Blue Mountains (Australia) <sup>2</sup> | 1999                | ≥ 49            | 3350        | -0.5                     | 14.4           |
|                                         |                     |                 |             | -4                       | 3.0            |
| Victoria (Australia) <sup>3</sup>       | 1999                | ≥ 30            | 4532        | -0.5                     | 16.8           |
|                                         |                     |                 |             | -2.5                     | 6.4            |
|                                         |                     |                 |             | -5                       | 2.1            |
|                                         |                     |                 |             | -7.5                     | 0.8            |
|                                         |                     |                 |             | -10                      | 0.3            |
|                                         |                     |                 |             | -12.5                    | 0.1            |
| Tanjong Pagar (Singapore) <sup>4</sup>  | 2000                | 40-49 (Male)    | 124         | -0.5                     | 45.2           |
|                                         |                     |                 |             | -5                       | 11.3           |
|                                         |                     | 50-59 (Male)    | 115         | -0.5                     | 25.2           |
|                                         |                     |                 |             | -5                       | 4.3            |
|                                         |                     | 40-49 (Female)  | 151         | -0.5                     | 51.7           |
|                                         |                     |                 |             | -5                       | 15.9           |
|                                         |                     | 50-59 (Female)  | 188         | -0.5                     | 27.1           |
|                                         |                     |                 |             | -5                       | 4.8            |
| Sumatra <sup>5</sup>                    | 2002                | ≥ 21            | 358         | -1                       | 22.4           |
|                                         |                     |                 |             | -6                       | 1.7            |
| Shihpai (Taiwan) <sup>6</sup>           | 2003                | ≥ 65            | 1361        | -1                       | 13.6           |
|                                         |                     |                 |             | -6                       | 2.3            |
| Beijing <sup>7</sup>                    | 2005                | ≥ 40            | 4319        | -0.5                     | 22.9           |
|                                         |                     |                 |             | -1                       | 16.9           |
|                                         |                     |                 |             | -5                       | 3.3            |
|                                         |                     |                 |             | -6                       | 2.6            |
|                                         |                     |                 |             | -8                       | 1.5            |
| Los Angeles Latino <sup>8</sup>         | 2006                | ≥ 40            | 5927        | -1                       | 16.8           |
|                                         |                     |                 |             | -6                       | 2.4            |
| Sawada <sup>9</sup>                     | 2008                | 40-49 Male      |             | -0.5                     | 70.3           |
|                                         |                     |                 |             | -5                       | 17.7           |
|                                         |                     | 50-59 Male      |             | -0.5                     | 49.6           |
|                                         |                     |                 |             | -5                       | 8.7            |
|                                         |                     | 40-49 Female    |             | -0.5                     | 67.8           |
|                                         |                     |                 |             | -5                       | 15.0           |
|                                         |                     | 50-59 Female    |             | -0.5                     | 42.4           |
|                                         |                     |                 |             | -5                       | 7.1            |
| Singapore-Malay <sup>10</sup>           | 2008                | ≥ 40            | 2974        | -0.5                     | 26.2           |
|                                         |                     |                 |             | -0.75                    | 21.8           |
|                                         |                     |                 |             | -1                       | 20.0           |
|                                         |                     |                 |             | -5                       | 3.9            |
| Segovia (Spain) <sup>11</sup>           | 2009                | ≥ 40            | 417         | -0.5                     | 25.4           |
|                                         |                     |                 |             | -6                       | 1.9            |
| Liwan (China) <sup>12</sup>             | 2009                | ≥ 50            | 1269        | -0.5                     | 32.3           |
|                                         |                     |                 |             | -5                       | 5.0            |

|                                      |      |                     |      |      |      |
|--------------------------------------|------|---------------------|------|------|------|
| Central India <sup>13</sup>          | 2010 | ≥ 30                | 4619 | -0.5 | 17.0 |
|                                      |      |                     |      | -1   | 13.0 |
|                                      |      |                     |      | -6   | 0.9  |
|                                      |      |                     |      | -8   | 0.4  |
| Multi-ethnic (USA) <sup>14</sup>     | 2013 | ≥ 45 (White)        | 1667 | -0.5 | 31.0 |
|                                      |      |                     |      | -5   | 5.4  |
|                                      |      | ≥ 45 (Chinese)      | 487  | -0.5 | 37.2 |
|                                      |      |                     |      | -5   | 11.8 |
|                                      |      | ≥ 45 (Black)        | 1230 | -0.5 | 21.5 |
|                                      |      | -5                  | 3.1  |      |      |
| SEED (Singapore) <sup>15</sup>       | 2013 | 40-49               | 2437 | -0.5 | 47.4 |
|                                      |      |                     |      | -1   | 37.7 |
|                                      |      |                     |      | -5   | 11.5 |
|                                      |      | 50-59               | 3013 | -0.5 | 35.9 |
|                                      |      |                     |      | -1   | 28.8 |
|                                      |      | -5                  | 6.7  |      |      |
| Namil (South Korea) <sup>16</sup>    | 2013 | 40-49 (Male)        | 96   | -0.5 | 29.2 |
|                                      |      |                     |      | -6   | 1.0  |
|                                      |      | 40-49 (Female)      | 102  | -0.5 | 42.2 |
|                                      |      |                     |      | -6   | 2.9  |
|                                      |      | 50-59 (Male)        | 145  | -0.5 | 17.9 |
|                                      |      | -6                  | 0.7  |      |      |
| Suzhou (China) <sup>17</sup>         | 2017 | ≥ 60                | 4795 | -0.5 | 21.1 |
|                                      |      |                     |      | -5   | 2.5  |
| Chinese American (USA) <sup>18</sup> | 2017 | ≥ 50                | 4414 | -0.5 | 35.1 |
|                                      |      |                     |      | -5   | 7.4  |
| Kumejima (Japan) <sup>19</sup>       | 2018 | ≥ 40                | 2383 | -0.5 | 29.5 |
|                                      |      |                     |      | -6   | 1.9  |
| Hisayama (Japan) <sup>20</sup>       | 2019 | ≥ 40 (2005)         | 1892 | -0.5 | 37.7 |
|                                      |      |                     |      | -5   | 5.8  |
|                                      |      |                     |      | -8   | 1.5  |
|                                      |      | ≥ 40 (2012)         | 2874 | -0.5 | 40.6 |
|                                      |      |                     |      | -5   | 8.0  |
| Inner Mongolia (China) <sup>21</sup> | 2019 | ≥ 40                | 2090 | -8   | 2.5  |
|                                      |      |                     |      | -0.5 | 45.8 |
|                                      |      |                     |      | -5   | 9.5  |
|                                      |      |                     |      | -8   | 3.0  |
| Yunnan (China) <sup>22</sup>         | 2019 | ≥ 40 (Han)          | 302  | -0.5 | 27.8 |
|                                      |      |                     |      | -6   | 3.0  |
|                                      |      | ≥ 40 (Yi ethnicity) | 77   | -0.5 | 14.2 |
|                                      |      |                     |      | -6   | 1.1  |

## References

1. Katz J, Tielsch JM, Sommer A. Prevalence and risk factors for refractive errors in an adult inner city population. *Invest Ophthalmol Vis Sci.* 1997;38:334-340.
2. Attebo K, Ivers RQ, Mitchell P. Refractive errors in an older population - The blue mountains eye study. *Ophthalmol.* 1999;106:1066-1072.
3. Wensor M, McCarty CA, Taylor HR. Prevalence and risk factors of myopia in Victoria, Australia. *Arch Ophthalmol.* 1999;117:658-663.
4. Wong TY, Foster PJ, Hee J, et al. Prevalence and risk factors for refractive errors in adult Chinese in Singapore. *Invest Ophthalmol Vis Sci.* 2000;41:2486-2494.
5. Saw SM, Gazzard G, Koh D, et al. Prevalence rates of refractive errors in Sumatra, Indonesia. *Invest Ophthalmol Vis Sci.* 2002;43:3174-80.
6. Cheng CY, Hsu WM, Liu JH, Tsai SY, Chou P. Refractive errors in an elderly Chinese population in Taiwan: the Shihpai Eye Study. *Invest Ophthalmol Vis Sci.* 2003;44:4630-8.
7. Xu L, Li J, Cui T, et al. Refractive error in urban and rural adult Chinese in Beijing. *Ophthalmology.* 2005;112:1676-83.
8. Tarczy-Hornoch K, Ying-Lai M, Varma R, Los Angeles Latino Eye Study G. Myopic refractive error in adult Latinos: the Los Angeles Latino Eye Study. *Invest Ophthalmol Vis Sci.* 2006;47:1845-52.
9. Sawada A, Tomidokoro A, Araie M, Iwase A, Yamamoto T, Tajimi Study G. Refractive errors in an elderly Japanese population - The Tajimi study. *Ophthalmol.* 2008;115:363-370.
10. Saw SM, Chan YH, Wong WL, et al. Prevalence and risk factors for refractive errors in the Singapore Malay Eye Survey. *Ophthalmology.* 2008;115:1713-9.
11. Anton A, Andrada MT, Mayo A, Portela J, Merayo J. Epidemiology of refractive errors in an adult European population: the Segovia study. *Ophthalmic Epidemiol.* 2009;16:231-7.
12. He M, Huang W, Li Y, Zheng Y, Yin Q, Foster PJ. Refractive error and biometry in older Chinese adults: the Liwan eye study. *Invest Ophthalmol Vis Sci.* 2009;50:5130-6.
13. Nangia V, Jonas JB, Sinha A, Matin A, Kulkarni M. Refractive error in central India: the Central India Eye and Medical Study. *Ophthalmology.* 2010;117:693-9.
14. Pan CW, Klein BE, Cotch MF, et al. Racial variations in the prevalence of refractive errors in the United States: the multi-ethnic study of atherosclerosis. *Am J Ophthalmol.* 2013;155:1129-1138 e1.
15. Pan CW, Zheng YF, Anuar AR, et al. Prevalence of refractive errors in a multiethnic Asian population: the Singapore epidemiology of eye disease study. *Invest Ophthalmol Vis Sci.* 2013;54:2590-8.
16. Yoo YC, Kim JM, Park KH, Kim CY, Kim TW, Namil Study Group KGS. Refractive errors in a rural Korean adult population: the Namil Study. *Eye (Lond).* 2013;27:1368-75.
17. Xu C, Pan C, Zhao C, et al. Prevalence and risk factors for myopia in older adult east Chinese population. *BMC Ophthalmol.* 2017;17:191.
18. Varma R, Torres M, McKean-Cowdin R, et al. Prevalence and Risk Factors for Refractive Error in Adult Chinese Americans: The Chinese American Eye Study. *Am J Ophthalmol.* 2017;175:201-212.
19. Nakamura Y, Nakamura Y, Higa A, et al. Refractive errors in an elderly rural Japanese population: The Kumejima study. *PLoS One.* 2018;13:e0207180.
20. Ueda E, Yasuda M, Fujiwara K, et al. Trends in the Prevalence of Myopia and Myopic Maculopathy in a Japanese Population: The Hisayama Study. *Invest Ophthalmol Vis Sci.* 2019;60:2781-2786.
21. Wang M, Ma J, Pan L, et al. Prevalence of and risk factors for refractive error: a cross-sectional study in Han and Mongolian adults aged 40–80 years in Inner Mongolia, China. *Eye.* 2019;
22. Wang M, Cui J, Shan G, et al. Prevalence and risk factors of refractive error: a cross-sectional Study in Han and Yi adults in Yunnan, China. *BMC Ophthalmol.* 2019;19:33.
